# Supplementary material for: A bismuth-atom electrocatalyst for a stable and economical aqueous Zn–CO2 battery
Source: Royal Society of Chemistry journal article supplement (doi:10.1039/d4ta03766a), 2024-01-01
Supplement: d4ta03766a1.pdf [file d4ta03766a1.pdf]

# Supporting Information for

## Bismuth-atom Electrocatalyst for a Stable and Economical Aqueous Zn-CO<sub>2</sub> Battery

Mahboob Alam <sup>#a</sup>, Jia Xu <sup>#a</sup>, Evan J. Hansen <sup>a</sup>, Ela Nurlaela <sup>b</sup>, Li Tao<sup>a</sup>, Alexander R. Uhl  
<sup>b</sup>, Jian Liu <sup>a\*</sup>

<sup>a</sup> School of Engineering, Faculty of Applied Science, The University of British Columbia,  
Kelowna, British Columbia, V1V 1V7, Canada

<sup>b</sup> Laboratory for Solar Energy and Fuels (LSEF), School of Engineering, The University  
of British Columbia, Kelowna, V1V 1V7 Canada

# The authors make equal contributions to this paper.

\*Corresponding author's E-mail: [jian.liu@ubc.ca](mailto:jian.liu@ubc.ca) (J. Liu)

## Experimental Section

**Materials.** Zinc(II) acetate dihydrate ( $\text{Zn}(\text{Ac})_2 \cdot 2\text{H}_2\text{O}$ , CAS No: 5970-45-6,  $\geq 98.0\%$  purity) was obtained from Ward's Science. N, N-dimethylformamide (DMF,  $\text{C}_3\text{H}_7\text{NO}$ , CAS No: 68-12-2) was sourced from Alfa Aesar. 2-Methylimidazole (2-MIM,  $\text{C}_4\text{H}_6\text{N}_2$ , CAS No: 693-98-1,  $\geq 99.0\%$  purity) and bismuth nitrate pentahydrate ( $\text{Bi}(\text{NO}_3)_3 \cdot 5\text{H}_2\text{O}$ , CAS No: 10035-06-0, 98.0% purity) was acquired from Sigma-Aldrich. Sulphuric acid ( $\text{H}_2\text{SO}_4$ , CAS No: 7664-93-9, 95-98.0% purity) was obtained from VWR. All of the chemical reagents were used as received without further purification.

**Synthesis of NC.** Under the typical procedure, 0.3 g  $\text{Zn}(\text{Ac})_2 \cdot 2\text{H}_2\text{O}$  was dissolved in 10 mL deionized water (DI), which was subsequently added into 10 mL DI containing 1.12 g of 2-MIM under ultrasonication for 10 minutes at room temperature. Subsequently, the Zn-ZIF was grown at room temperature for 24 h. The as-obtained precipitates were isolated from the solution using centrifugation, then washed with methanol three times and dried in a vacuum at  $60\text{ }^\circ\text{C}$  overnight. After drying, the Zn-ZIF precursors underwent heating at  $900\text{ }^\circ\text{C}$  for 2 hours with a heating rate of  $5\text{ }^\circ\text{C min}^{-1}$  under an Ar flow. Subsequently, they were treated with 0.5 M  $\text{H}_2\text{SO}_4$  for 4 hours under continuous stirring to produce the N-doped carbon matrix derived from Zn-ZIF (referred to as NC).

**Synthesis of Bi-SAs/NC.** First, 100 mg NC and 9.8 mg  $\text{Bi}(\text{NO}_3)_3 \cdot 5\text{H}_2\text{O}$  were dissolved in 10 mL DMF. The solution was stirred for 2 h and dried under vacuum at  $60\text{ }^\circ\text{C}$  overnight (8 h). Next, the obtained black product was heated to  $700\text{ }^\circ\text{C}$  for 2 h at a heating rate of  $5\text{ }^\circ\text{C min}^{-1}$  under Ar flow to obtain the final material, labeled Bi-SAs/NC.

**Characterization Methods.** The X-ray diffraction (XRD) experiments were carried out in Cu-K $\alpha$  radiation ( $\lambda = 1.5418\text{ \AA}$ ) at a scan rate of  $4^\circ\text{ min}^{-1}$ . Scanning electron microscopy (SEM, Tescan Mira 3 XMU) and transmission electron microscopy (TEM, Tecnai F20) analysis were applied to study the morphologies and microstructure of samples. The X-ray photoelectron spectroscopy (XPS) measurements were done using a PHI 5700 ESCA System. The Raman spectra were acquired using a Bruker Sunterra II Raman spectrometer using a 6 mW laser with a wavelength of 532 nm.

## Electrochemical characterization

A Biologic electrochemical workstation (model SP-150) was used to measure the electrocatalytic activity of the catalysts. Initially, a three-electrode, single-compartment cell made of Teflon was employed to test the activity of Bi-SAs/NC in neutral ( $N_2$  saturated electrolyte) and  $CO_2$ RR conditions ( $CO_2$  saturated electrolyte). The gas diffusion electrode (GDE Freudenberg H23C3, Model 1590044 at Fuel Cell Store ©) modified with electrocatalyst ink suspension (as Working electrode–WE), Pt wire (as counter electrode), and Ag/AgCl (as Reference Electrode–RF) were used in 0.5 M  $KHCO_3$  (potassium hydrogen carbonate–99 to 100% / Thermo Scientific CAS 298-14-6) to collect the data. Double layer capacitance ( $C_{dl}$ ) was calculated using Cyclic Voltammetry (CVs) at different scan rates.

The H-type cell consists of two glass compartments joined with a metal clamp. The anolyte and catholyte were separated using a Nafion™ membrane (111 Nafion™) during the experimentation. Platinum mesh (as CE), Ag/AgCl (as RE) and GDE cut into a bell shape and modified with electrocatalysts (as WE) were applied with a 0.5 M  $KHCO_3$  solution saturated with  $CO_2$  (pH = 7.5). A mass flow controller (ALICAT scientific) was used to control the flow of  $CO_2$  gas between 6 to 8 sccm.

To analyze the gaseous products, an H-type cell coupled with gas chromatography (Thermo scientific trace 1300 series) employed automatic injection at set potentials after an interval of 30 minutes. To address the limitation of run-off time in the continuous GC product detection, measurements were constrained to two per hour. The GC was equipped with a Pulsed Discharged Detector (PDD) and an oven set with a ramped temperature setting from 50 to 250 °C over 30 mins. The liquid products in the electrolyte were analyzed by *ex-situ* Nuclear Magnetic Resonance (Bruker AVII 600 MHz spectrometer) spectroscopy using  $^1H$ -spectra with water suppression (Watergate W5 pulse sequence, 256 scans) after 3 hours of chronoamperometry testing at a constant potential of -0.99 V (vs. RHE). Following experimentation, the electrolyte (686  $\mu$ L of the 60 mL total) was combined with an internal standard *d*6-Dimethyl Sulfoxide (DMSO 34  $\mu$ L, Sigma Aldrich CAS: 2206-27-1) and  $D_2O$  (80  $\mu$ L) for NMR testing.

The equation for gas products

$$FE_{\%} = v \times \frac{z_i C_i F}{i} \times 100 \quad E1^1$$

Where  $v$  is the volume of gas leaving the H-type cell,  $z_i$  is the number of electrons involved in the generation of product,  $C_i$  is the concentration of product under consideration,  $F$  is the Faraday constant, and  $i$  is the applied current.

The equation for liquid products

$$FE_{\%} = V_{total} \times \frac{z_i C_i F}{C_{total}} \times 100 \quad E2^1$$

Where  $V_{total}$  is the total volume of collected electrolyte sample,  $C_{total}$  is the total charge required to generate the product,  $z_i$  is the number of electrons utilized to catalyze the product,  $C_i$  is the concentration of product calculated using NMR integrated data, and  $F$  is the faraday constant.

The equation for Liquid products

$$C_i = \frac{I_i}{I_{std}} \times \frac{n_{std}}{n_i} C_{std} \quad E3^1$$

Where  $I_i$  and  $I_{std}$  are the NMR integral of the compound and standard (DMSO), and  $n_i$  and  $n_{std}$  represent the number of protons in each of the compound and standard, respectively, used to calculate single product concentration.

### Zn-CO<sub>2</sub> battery measurement

A custom cell arrangement consisting of two chambers separated by a Nafion™ membrane (111 Nafion™) was used to construct the Zn-CO<sub>2</sub> battery. The electrocatalysts were drop cast onto GDE with an areal loading of 0.5 mg cm<sup>-2</sup> with a cathode area of 1 cm<sup>2</sup>. The anode area was matched at 1 mA cm<sup>2</sup>, using Zn foil (thickness = 100 μm) that was first cleaned with isopropanol. The anolyte chamber was filled with 1 M KOH + 0.2 M zinc acetate solution, the catholyte chamber was filled with a 0.5 M KHCO<sub>3</sub> solution, and the gas chamber on the cathode side was purged with CO<sub>2</sub> at 5 sccm. The CO<sub>2</sub> battery performance was tested using galvanic discharge and charge testing with a Biologic workstation (SP-150). The discharge and charge cycles were set to 20 mins (total 40 mins for 1 cycle) and the Linear Sweep Voltammetry (LSV) was screened at 10 mV s<sup>-1</sup> to produce the polarization curves.

## Figures

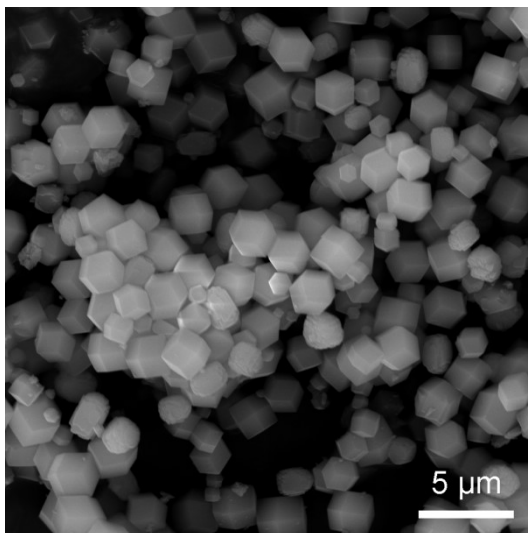

**Figure S1.** SEM image of ZIF-8.

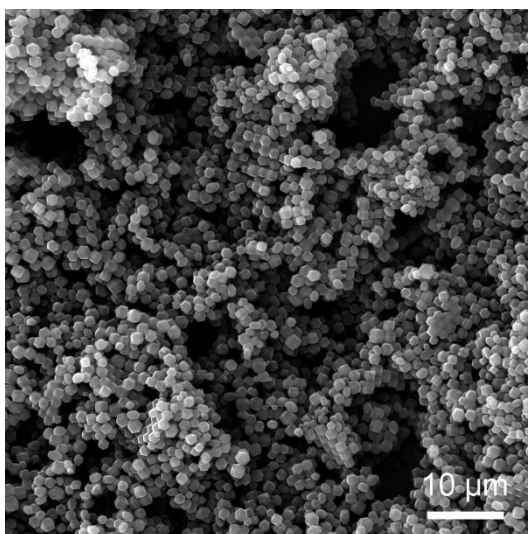

**Figure S2.** SEM image of NC.

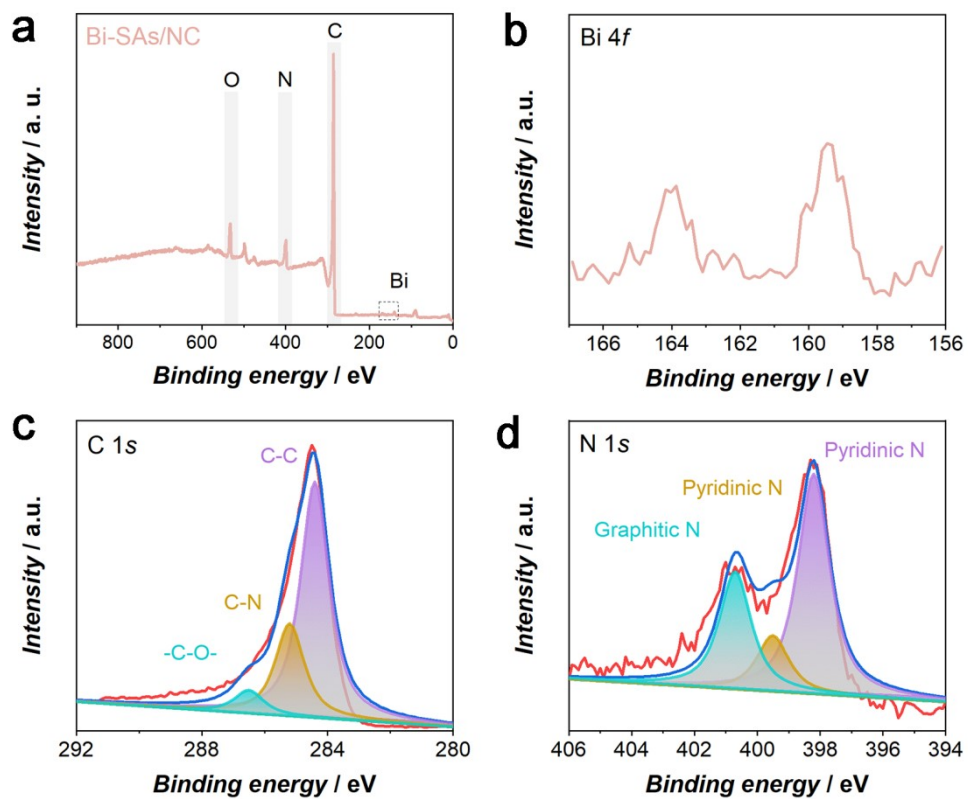

**Figure S3.** (a) XPS survey spectrum of Bi-SAs/NC; the high-resolution XPS spectra of (b) Bi 4f, (c) C 1s, and (d) N 1s from Bi-SAs/NC.

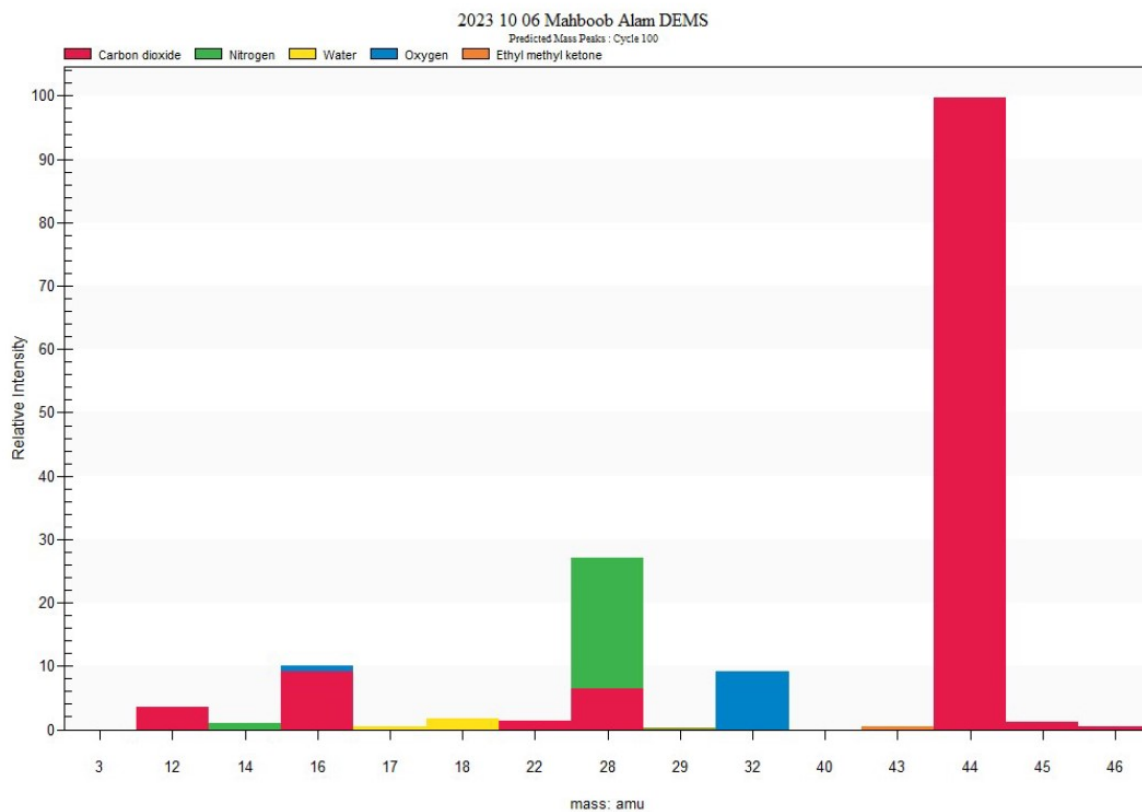

**Figure S4.** Electrochemical activity of Bi-SAs/NC towards CO<sub>2</sub>RR measured in Differential Electrochemical cell emulating Zn-CO<sub>2</sub> system coupled with MS.

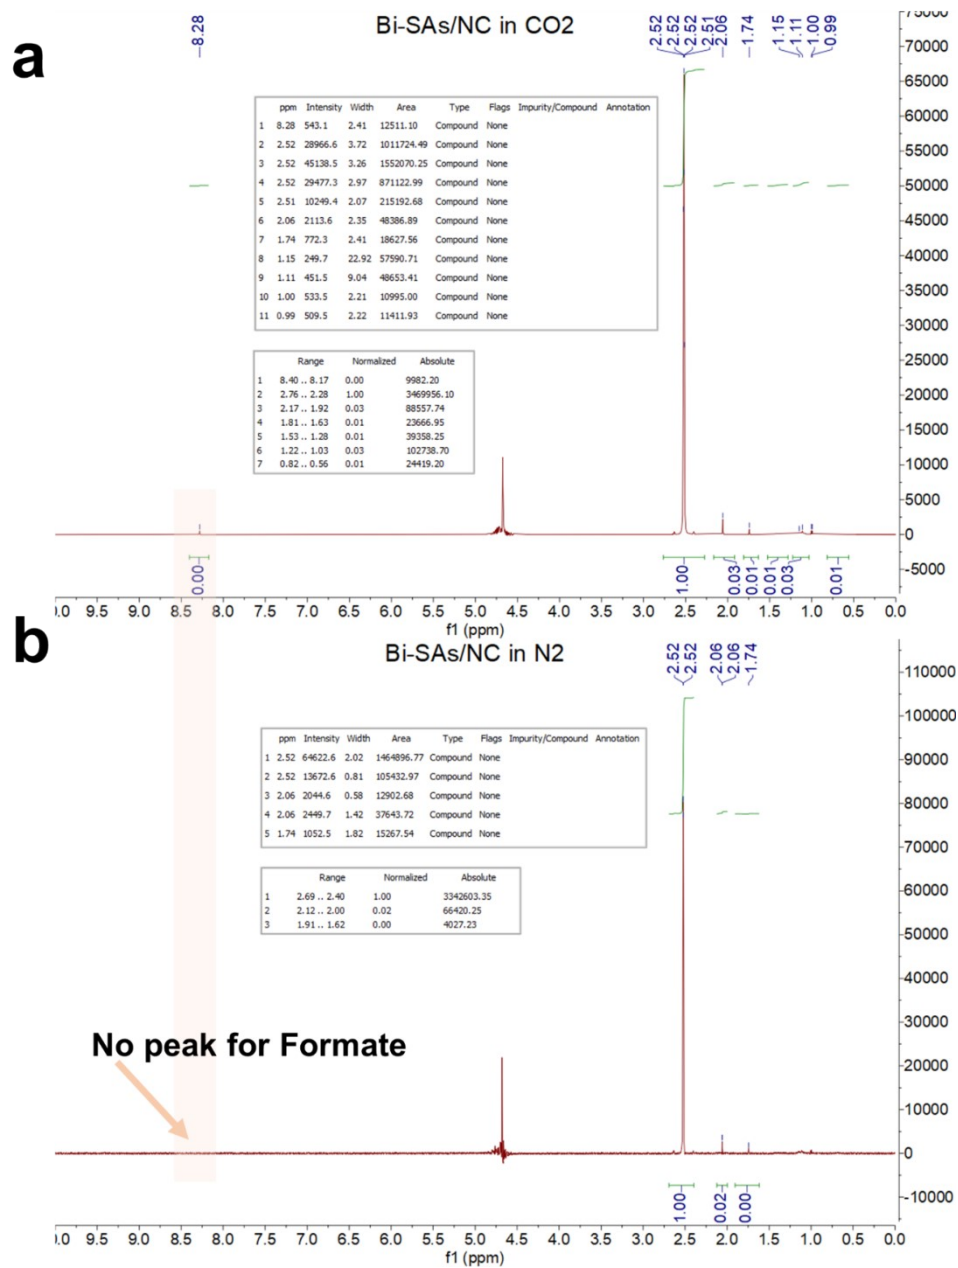

**Figure S5.** <sup>1</sup>H-NMR spectra of the 0.5 M KHCO<sub>3</sub> catholyte (a) purged with CO<sub>2</sub> (b) purged with N<sub>2</sub>, containing expected liquid products after 3 h of chronoamperometry test at -0.99 V (vs. RHE) on GDE modified with Bi-SAs/NC



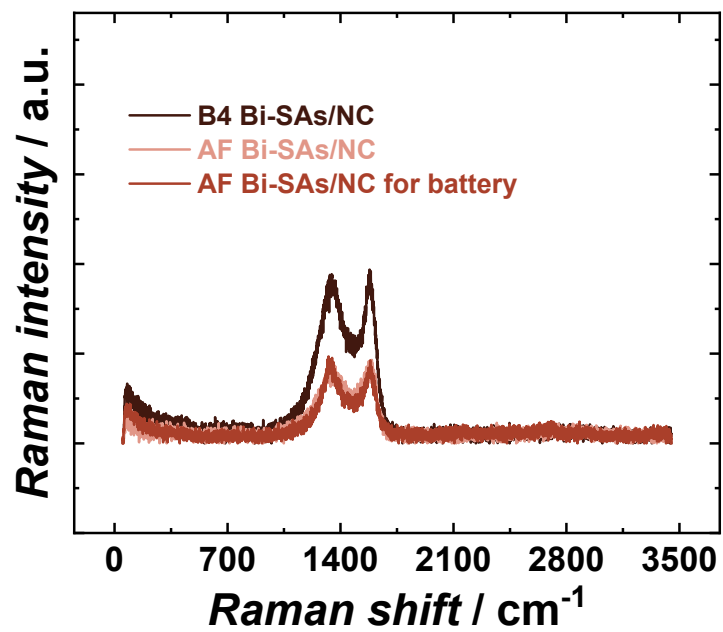

**Figure S6.** Raman spectra of Gas Diffusion Electrodes (GDE) modified with Bi-SAs/NC before (B4) the CO<sub>2</sub>RR test, after (AF) CO<sub>2</sub>RR test in H-type cell and after Zn-CO<sub>2</sub> battery discharge-charge cycling.

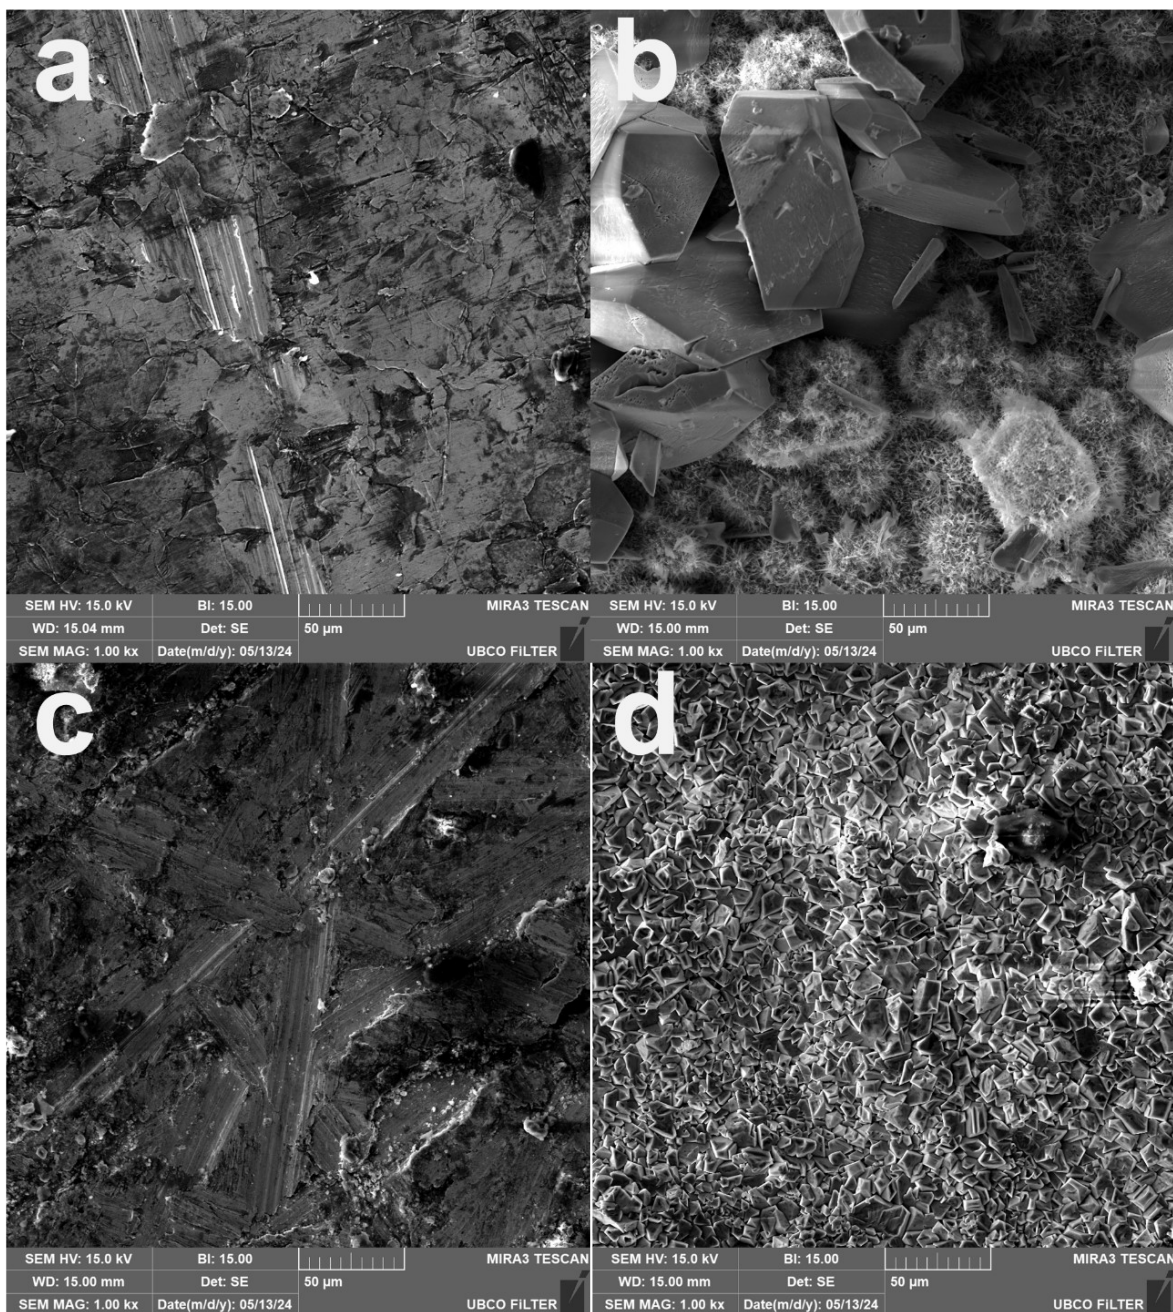

**Figure S7.** SEM images of the cross-section for both fresh Zn foil electrodes (a) before and (b) after cycling; Recycled Zn electrodes (c) before and (d) after cycling.

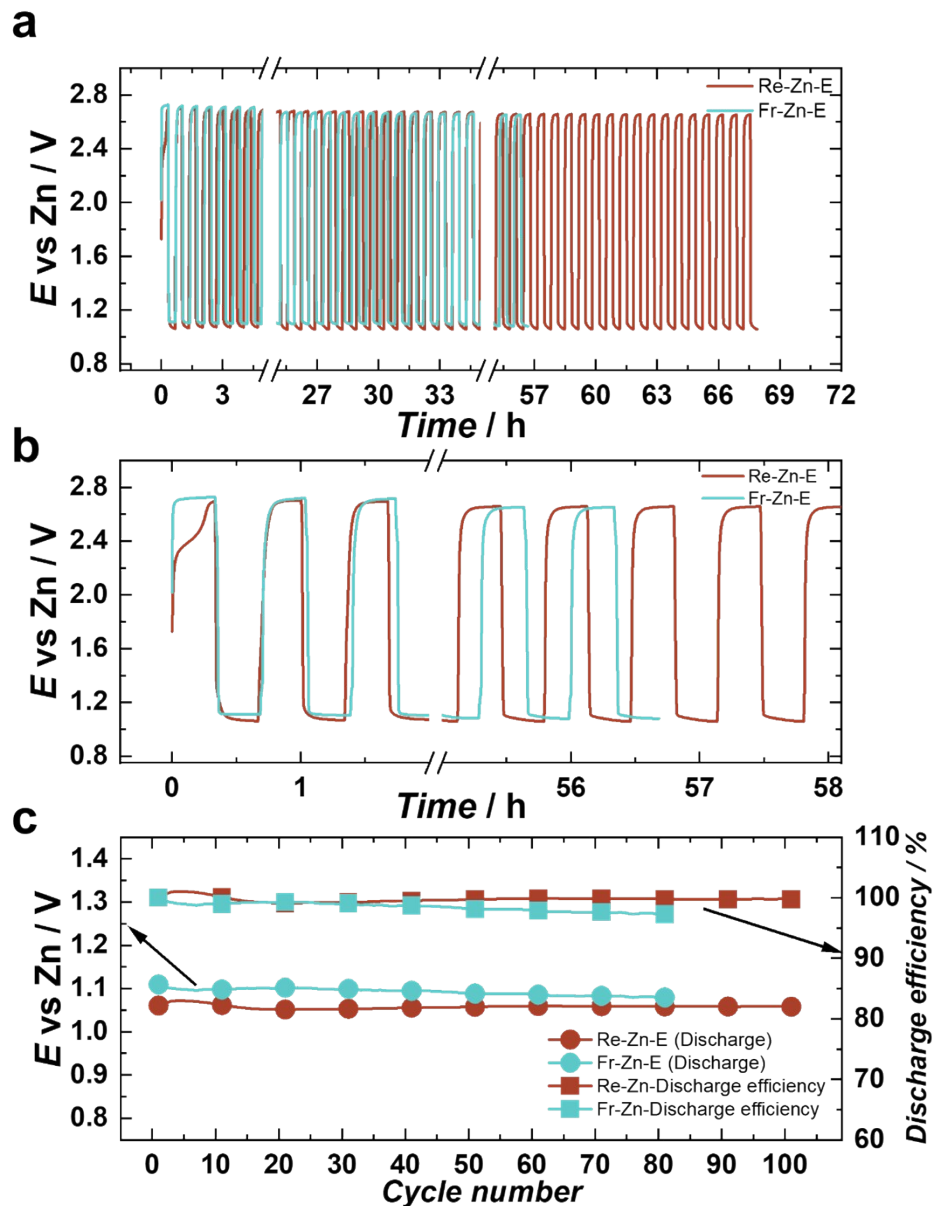

**Figure S8** (a) The galvanic discharge and charge cycling of a Bi-SAs/NC modified gas diffusion electrode (GDE) at a current density of  $0.5 \text{ mA cm}^{-2}$  using fresh Zn (cycling for 57 h) and recycled Zn (cycling for 67 h) as anode (b) Isolated galvanic discharging and charging cycling for Bi-SAs/NC showing differences between specific cycles (c) comparison of the discharge potential and efficiency of both reversible Zn-CO<sub>2</sub> batteries for 100 cycles.

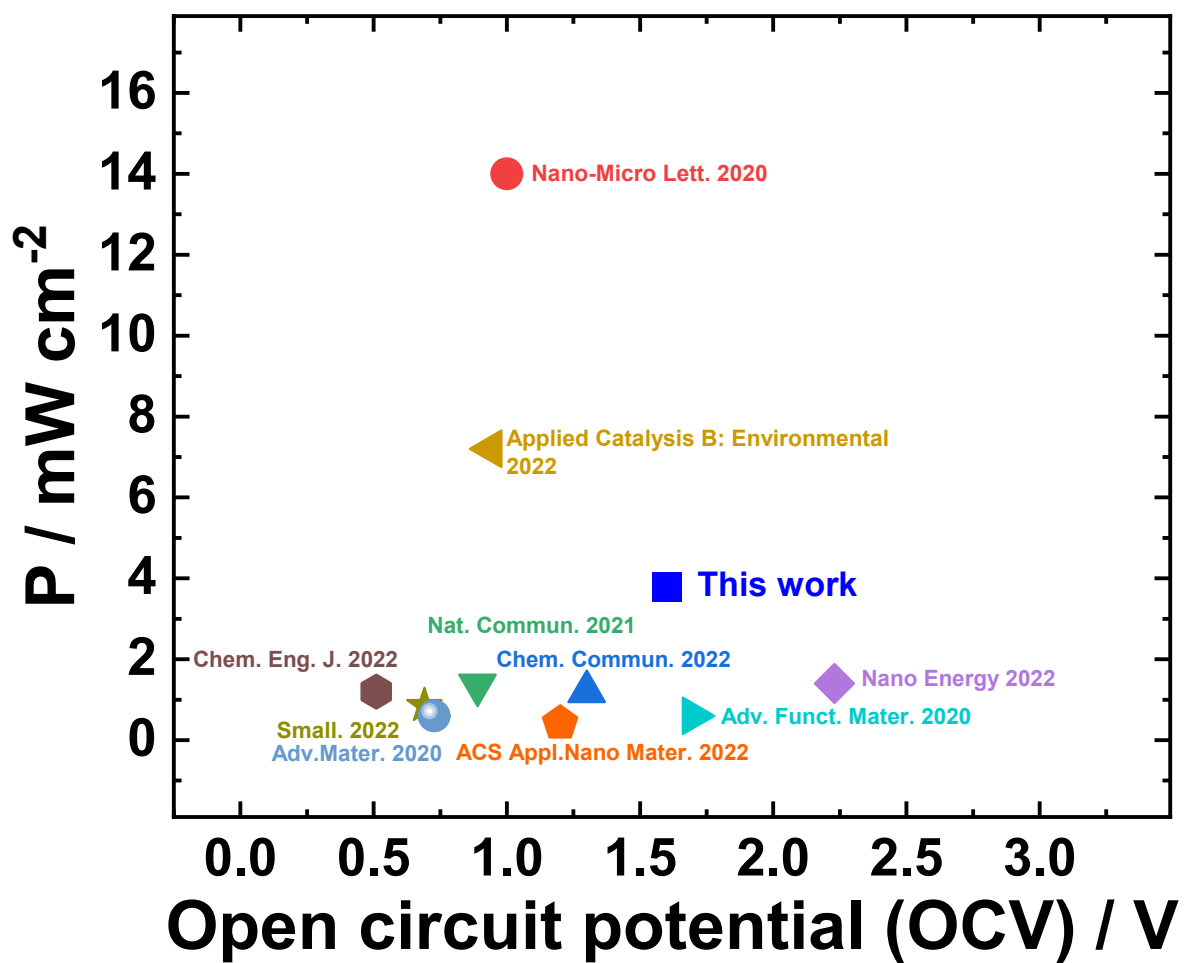

**Figure S9.** Comparison of power densities against open circuit voltage towards non-precious metal-based Zn-CO<sub>2</sub> batteries.

## Tables

**Tables S1.** The elemental composition of the Bi-SAs/NC.

| <i>Elements</i> | <i>Content (at %) by XPS</i> |
|-----------------|------------------------------|
| <b>C</b>        | 85.8                         |
| <b>N</b>        | 6.2                          |
| <b>O</b>        | 7.8                          |
| <b>Bi</b>       | 0.2                          |

**Tables S2.** Zn-CO<sub>2</sub> battery performance with those reported electrocatalysts.

| <b>Catalysts</b>                           | <b>Electrolyte</b>                           | <b>Discharge products</b>                                                | <b>OCV (V)</b> | <b>Power density (mW cm<sup>-2</sup>)</b> | <b>Stability</b> | <b>Ref.</b>                                          |
|--------------------------------------------|----------------------------------------------|--------------------------------------------------------------------------|----------------|-------------------------------------------|------------------|------------------------------------------------------|
| <b>Bi-SAs/NC</b>                           | <b>0.5 M KHCO<sub>3</sub></b>                | <b>HCOOH<br/>CH<sub>3</sub>CH(OH)<sub>2</sub><br/>CH<sub>3</sub>COOH</b> | <b>1.6 V</b>   | <b>3.8 and 3.2 mW cm<sup>-2</sup></b>     | <b>67 h</b>      | <b>This work</b>                                     |
| Ni-N <sub>4</sub> sites                    | 0.5M KHCO <sub>3</sub>                       | CO (g)                                                                   | 1.37 V         | 1.4 mW cm <sup>-2</sup>                   | 20 h             | Nano-Micro Lett. 2020, 12, 108                       |
| Metal Bi with abundant defects             | 2M KHCO <sub>3</sub> +0.02 HCOO <sup>-</sup> | HCOOH (l)                                                                | 1.3 V          | 1.2 mW cm <sup>-2</sup>                   | 22 h             | Chem. Commun. 2022, 58, 3621                         |
| Ni and Fe single atoms in N-doped graphene | 2M KCl                                       | CO (g)                                                                   | 0.89 V         | 1.36 mW cm <sup>-2</sup>                  | 90 h             | Nat. Commun. 2021, 12, 4088                          |
| Bi nanoparticles in N-doped carbon         | 2M KHCO <sub>3</sub> +0.02 HCOOH             | HCOOH (l)                                                                | 2.23 V         | 1.4 mW cm <sup>-2</sup>                   | 20 h             | Nano Energy 2022, 92, 106780                         |
| BiC/HCS                                    | 0.1 M KHCO <sub>3</sub>                      | HCOOH (l)                                                                | 0.94 V         | 7.2 ± 0.5 mW cm <sup>-2</sup>             | 10 h             | Applied Catalysis B: Environmental 307 (2022) 121145 |
| Cu-N <sub>2</sub> on graphene matrix       | 0.5M KHCO <sub>3</sub>                       | CO (g)                                                                   | 1.7 V          | 0.6 mW cm <sup>-2</sup>                   | 40 h             | Adv. Funct. Mater. 2020, 30, 1907658                 |
| Single Fe atom on B and N codoped carbon   | 0.8M KHCO <sub>3</sub>                       | CO (g)                                                                   | 0.51 V         | 1.2 mW cm <sup>-2</sup>                   | 27 h             | Chem. Eng. J. 2022, 437, 135294                      |
| Fe-P@NCPs                                  | 0.1 M KHCO <sub>3</sub>                      | CO (g)                                                                   | 0.691 V        | 0.85 mW cm <sup>-2</sup>                  | 168 h            | Small. 2022, 18, 2104965                             |
| FeNC NSs-1000                              | 0.5 M KHCO <sub>3</sub>                      | CO (g)                                                                   | -              | 1.05 mW cm <sup>-2</sup>                  | 30 h             | Nano Energy. 113 (2023) 108568                       |
| BiPdC                                      | 0.1 M KHCO <sub>3</sub> with 0.1 M HCOONa    | HCOOH (l)                                                                | 1.2 V          | 0.42 mW cm <sup>-2</sup>                  | 45 h             | ACS Appl.Nano Mater. 2022,5, 12387-12394             |
| Ni-N <sub>3</sub> -NCNFs                   | 0.5 M KHCO <sub>3</sub>                      | CO (g)                                                                   | -              | 1.05 mW cm <sup>-2</sup>                  | 46 h             | Adv. Funct. Mater.2021, 31, 2008146                  |
| Zn/NC NSs                                  | 0.5 M KHCO <sub>3</sub>                      | CO (g)                                                                   | -              | 1.8 mW cm <sup>-2</sup>                   | 25 h             | Angew.Chem.Int.Ed. 2022,61,e202111683                |
| Fe1NC/S <sub>1</sub> -1000                 | 0.8 M KHCO <sub>3</sub>                      | CO (g)                                                                   | 0.727 V        | 0.6 mW cm <sup>-2</sup>                   | 25 h             | Adv.Mater. 2020, 32, 2002430                         |
| Ni@N-C                                     | 0.5 M KHCO <sub>3</sub>                      | CO (g)                                                                   | -              | 1.64 mW cm <sup>-2</sup>                  | 43 h             | Small 2023, 19, 2301128                              |

## References

1. H.-P. Iglesias van Montfort, S. Subramanian, E. Irtem, M. Sassenburg, M. Li, J. Kok, J. Middelkoop and T. Burdyny, *ACS Energy Letters*, 2023, **8**, 4156-4161.
